# Supplementary material
Source: Springer Nature journal article supplement (https://www.springermedizin.de/resource/supplementary/12987_2012_47_MOESM4_ESM.pdf/9680730)

A

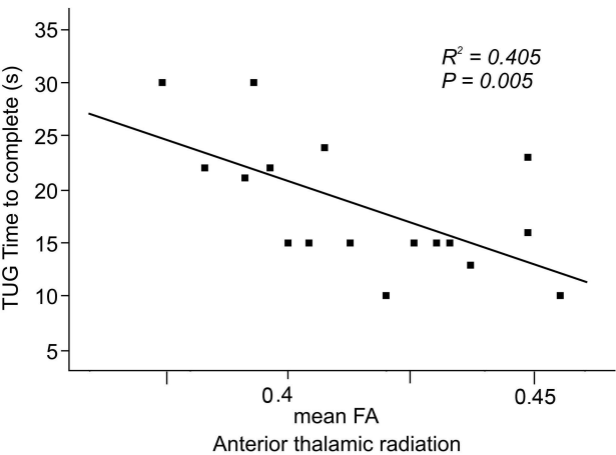

B

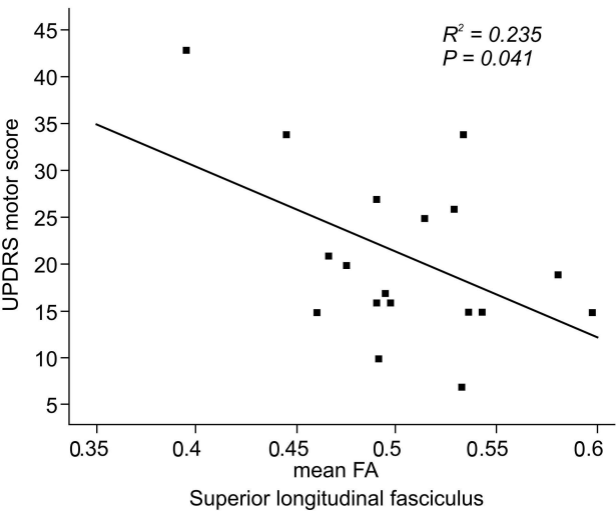

Supplement: MOESM4 [file 9680730]
